# Supplementary material for: Cryptotanshinone Protects Cartilage against Developing Osteoarthritis through the miR-106a-5p/GLIS3 Axis
Source: PubMed Central journal article supplement — Mol Ther Nucleic Acids. 2018 Feb 8;11:170–9. doi: 10.1016/j.omtn.2018.02.001 (PMC5992348; doi:10.1016/j.omtn.2018.02.001), 2018-02-08
Supplement: mmc1.pdf [file mmc1.pdf]

**OMTN, Volume 11**

**Supplemental Information**

**Cryptotanshinone Protects Cartilage  
against Developing Osteoarthritis  
through the miR-106a-5p/GLIS3 Axis**

**Quanbo Ji, Dengbin Qi, Xiaojie Xu, Yameng Xu, Stuart B. Goodman, Lei Kang, Qi Song, Zhongyi Fan, William J. Maloney, and Yan Wang**

## Figure S1

**A**

| Target gene | ResfSeq Id   |
|-------------|--------------|
| GLIS3       | NM_001042413 |
| HMGA2       | NM_003483    |
| SMAD7       | NM_005904    |
| CCND1       | NM_053056    |
| CDK6        | NM_001259    |

**B**

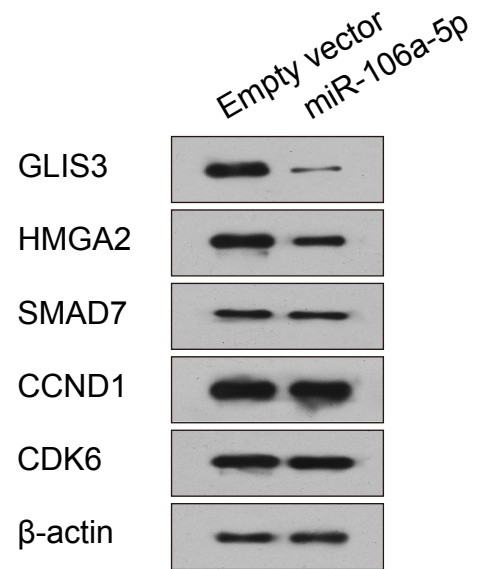

**Figure S1. Potential target genes of miR-106a-5p screened.** (A) Candidate target genes of miR-106a-5p were found using publicly available databases (TargetScan and miRanda). (B) Immunoblot analysis showing the expression of the candidate target genes in chondrocytes infected with miR-106a-5p.

## Figure S2

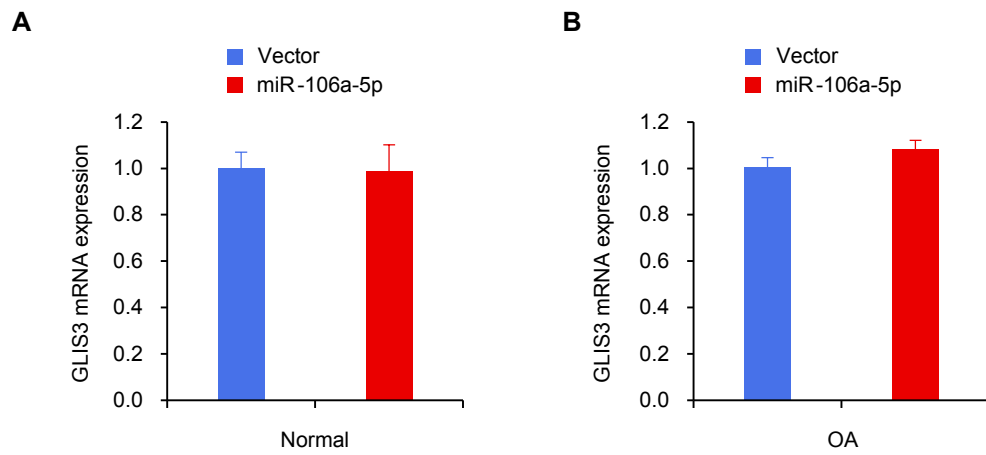

**Figure S2. miR-106a-5p regulates GLIS3 expression in a posttranscriptional way.** (A and B) Analysis of normal (A) and OA (B) chondrocytes transfected with scramble or miR-106a-5p mimics. The corresponding miRNA expression was determined using qRT-PCR. Each bar represents the mean of at least three independent experiments performed in triplicate  $\pm$  standard deviation. \* $p < 0.05$ , \*\* $p < 0.01$ .

---

**Table S1** Clinical and demographic characteristics of the study population\*

---

**Clinical data**

---

|                         |            |
|-------------------------|------------|
| Age, years              | 61.2 ± 3.8 |
| Male/ female (n)        | 16/24      |
| Disease duration, years | 10.2 ± 3.6 |
| Swollen joints (n)      | 1.3 ± 0.2  |
| Tender joints (n)       | 1.2 ± 0.6  |
| HSS score <sup>a</sup>  | 46.7 ± 6.2 |
| CRP, mg/dl              | 0.5 ± 0.3  |
| ESR, mm/h               | 14.2 ± 7.1 |

---

\* Data are shown as the mean ± standard deviation or absolute numbers.

<sup>a</sup> The Hospital for Special Surgery Knee Score (HSS) was used. Scores can change from 0 to 100, with lower scores suggesting greater disease activity.

CRP, C-reactive protein; ESR, erythrocyte sedimentation rate.

---

**Table S2** Sequences of DNA and RNA Oligonucleotides

---

| <b>Name</b>                                   | <b>Forward (5'→3')</b>           | <b>Reverse (5'→3')</b>              |
|-----------------------------------------------|----------------------------------|-------------------------------------|
| <b>Primer sequences for real-time qRT-PCR</b> |                                  |                                     |
| <b>GLIS3</b>                                  | AAGGCAGCTGCAACAATCTAGTGG         | CCGTCAGACTCAAGGTCGTGGA              |
| <b>β-actin</b>                                | ATCACCATTGGCAATGAGCG             | TTGAAGGTAGTTTCGTGGAT                |
| <b>Primers sequences for PCR</b>              |                                  |                                     |
| <b>GLIS3 3'UTR</b>                            | AAGCTCTCTTGGCCACTCCTGC           | TTTTTTAACATGTATAAAAAGCTTTAATT       |
| <b>GLIS3 3'UTR Mut</b>                        | TGTTGCTGACATAAATACAGGGG          | ACAACGACTGTATTTATGTCCCC             |
| <b>P1 (-186 bp)</b>                           | AAACCTAGCTTAGACTCTGTAAG          | CCTATTCTGTAGCAAAAATTTTAA            |
| <b>P2 (-439 bp)</b>                           | GAAGACTCGAATACTCATCCTGG          | TGTGGTTTCAACCAAATCCTGAGA            |
| <b>P3 (-761 bp)</b>                           | CITAGGTAAAATAAGCACTTGAAAAT       | AGATCATTCAGAGCTTTTGGGC              |
| <b>P4 (-1000 bp)</b>                          | ATTGATGTATAAGTTTATAAATCAG        | AACATACAGCAAGGAAGTGAGC              |
| <b>P5 (-761 bp, Mut)</b>                      | ATTAATGGGGTGAAATCAAGAATATTCATTAA | TTAAATGAATATTCCTTGATTTCCACCCCATTAAT |
| <b>GLIS3</b>                                  | ATGAATGGAAGATCATGCAGCATGA        | TAGCCTTCGGTGTAGACAGAGGA             |
| <b>PAX5</b>                                   | ATGGATTTAGAGAAAAATTATCCG         | TCAGTGACGGTCATAGGCAGTGGC            |
| <b>IRF2</b>                                   | ATGCCGGTGAAAGGATGCGCA            | TTAACAGCTCTTGACGCGGGCCT             |
| <b>STAT4</b>                                  | ATGTCTCAGTGGAATCAAGTCCAAC        | TCATTACAGCAGAATAAGGAGACTT           |

---
